# Supplementary material for: A highly sensitive fluorescence assay for methyltransferase activity by exonuclease-aided signal amplification
Source: Royal Society of Chemistry journal article supplement (doi:10.1039/c5an00732a), 2015-01-01
Supplement: c5an00732a1.pdf [file c5an00732a1.pdf]

# Highly Sensitive Fluorescence Assay for Methyltransferase Activity by Exonuclease-aided Signal Amplification

Feng Tang,<sup>†</sup> Xi-Wen Xing,<sup>†</sup> Jie-Mei Chu, Quan Yuan, Xiang Zhou, Yu-Qi Feng,\* Bi-Feng Yuan\*

Key Laboratory of Analytical Chemistry for Biology and Medicine (Ministry of Education),  
Department of Chemistry, Wuhan University, Wuhan 430072, P.R. China

<sup>†</sup> These authors contributed equally to this work.

\*To whom correspondence should be addressed. Tel.: +86-27-68755595; fax: +86-27-68755595. E-mail address: bfyuan@whu.edu.cn; yqfeng@whu.edu.cn

Table S1. Comparison of the different methods for assay of DAM activity.

| Methods                                                                                                 | Analytical Time (min) | Detection Limit (U/mL) | Biological Samples analyzed | References | Years |
|---------------------------------------------------------------------------------------------------------|-----------------------|------------------------|-----------------------------|------------|-------|
| Fluorescent DNA hairpin probe                                                                           | 30                    | 0.8                    | NO                          | 1          | 2007  |
| Gold nanoparticle-based colorimetric assay                                                              | 120                   | -                      | NO                          | 2          | 2009  |
| Colorimetric assay by methylation-responsive DNAzyme-based signal amplification                         | 155                   | 0.25                   | NO                          | 3          | 2010  |
| Electrochemical assay by gold nanoparticle amplification                                                | 240                   | 0.12                   | NO                          | 4          | 2011  |
| Fluorescent assay by hairpin-shaped DNAzyme signal amplification                                        | 180                   | 0.8                    | NO                          | 5          | 2012  |
| Bioluminescence assay by methylation-resistant cleavage                                                 | 340                   | 0.08                   | NO                          | 6          | 2012  |
| Rolling circle amplification-induced chemiluminescence                                                  | 120                   | 0.000129               | NO                          | 7          | 2013  |
| Colorimetric assay by methylation-blocked cascade amplification                                         | 77                    | 0.4                    | NO                          | 8          | 2014  |
| Fluorescence approach by rolling circle amplification                                                   | 225                   | 0.18                   | NO                          | 9          | 2014  |
| Fluorescent assay by methylation-sensitive cleavage coupled with exonuclease-aided signal amplification | 30                    | 0.0025                 | <i>E. coli cells</i>        | This work  | 2015  |

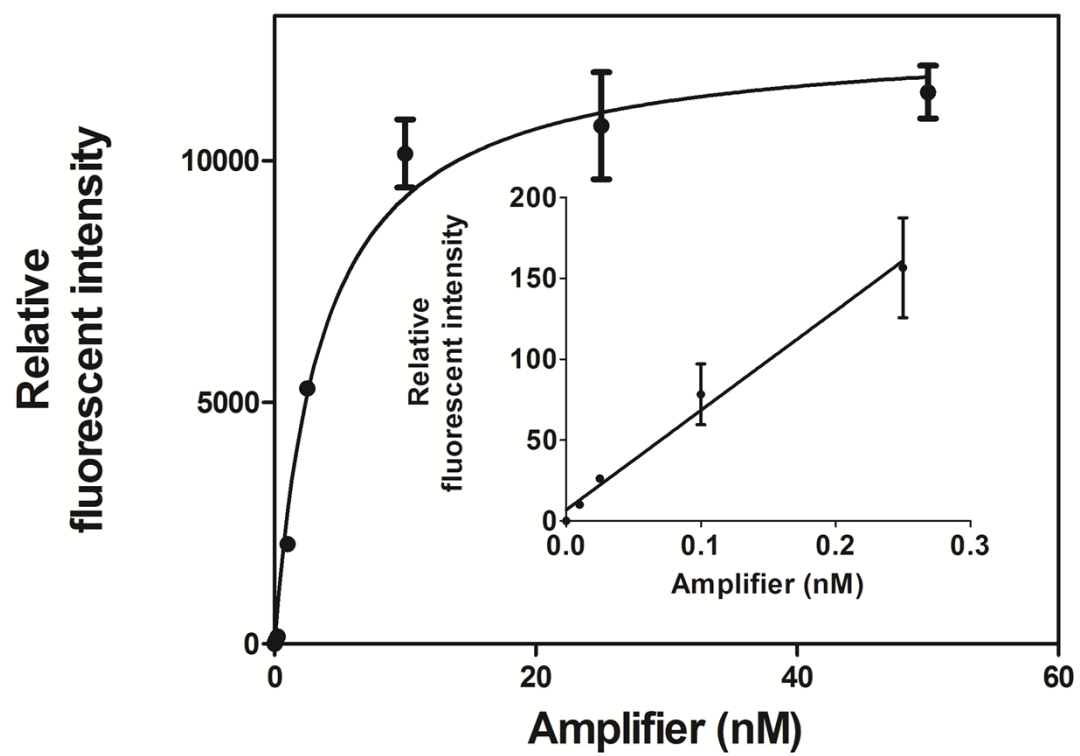

Figure S1. Relative fluorescent intensity with different amounts of Amplifier.

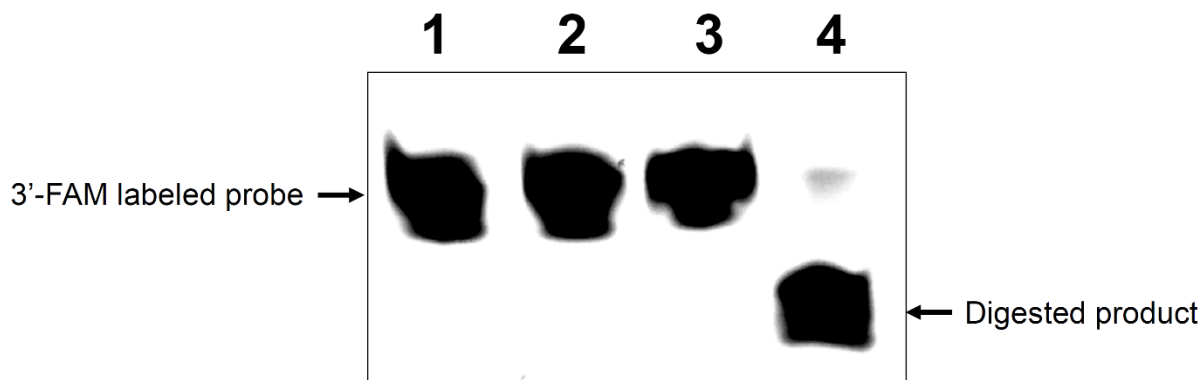

Figure S2. Gel electrophoresis analysis of the digestion of substrate upon DAM methylation and Dpn I digestion. 3'-FAM labeled probe (5'-TATACGCACCGTCCTACGATCCGTTTTTCGGATCGTAGGACGGTGCGTATAAATG-FAM-3') was used for the evaluation. The reaction mixture (20  $\mu$ L) consisted of 50 nM 3'-FAM labeled probe, 160  $\mu$ M SAM, and 1 U of DAM. The reaction buffer contained 20 mM Tris-HCl (pH 7.5), 10 mM MgCl<sub>2</sub>, 50 mM KCl, and 1 mM DTT. The experiment was performed at 37 °C for 20 min. The products were separated by 10% denaturing polyacrylamide gel electrophoresis (PAGE) in the presence of 7 M urea and quantitated on a Molecular Imager PhorosFX system (Bio-Rad Hercules, CA). The direction of running gel is from top to bottom. Lane 1, 3'-FAM probe alone; lane 2, 3'-FAM labeled probe + Dpn I; lane 3, 3'-FAM labeled probe + DAM; lane 4, 3'-FAM labeled probe + DAM + Dpn I.

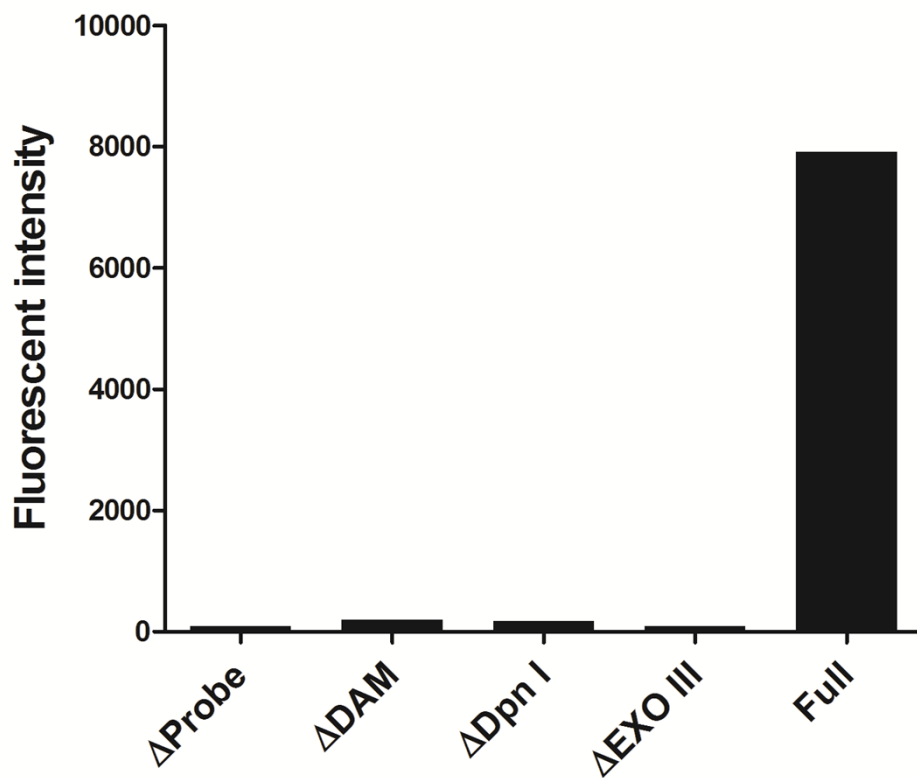

Figure S3. Relative fluorescence intensity in response to different controls. Column 1, the reaction mixture with omitting hairpin probe; column 2, the reaction mixture with omitting DAM; column 3, the reaction mixture with omitting Dpn I; column 4, the reaction mixture with omitting EOX III; column 5, the reaction mixture containing all the above components.

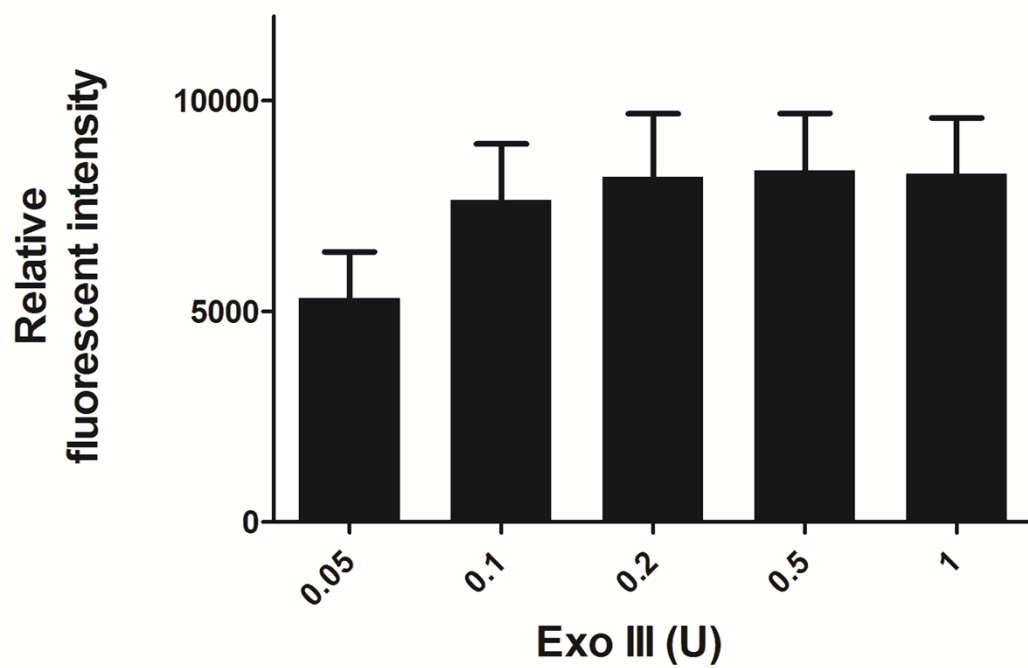

Figure S4. Relative fluorescence intensity in response to different concentrations of Exo III.

## References

- (1) Li, J.; Yan, H. F.; Wang, K. M.; Tan, W. H.; Zhou, X. W. *Analy chem* **2007**, *79*, 1050-1056.
- (2) Song, G.; Chen, C.; Ren, J.; Qu, X. *ACS Nano* **2009**, *3*, 1183-9.
- (3) Li, W.; Liu, Z.; Lin, H.; Nie, Z.; Chen, J.; Xu, X.; Yao, S. *Anal Chem* **2010**, *82*, 1935-41.
- (4) He, X.; Su, J.; Wang, Y.; Wang, K.; Ni, X.; Chen, Z. *Biosens Bioelectron* **2011**, *28*, 298-303.
- (5) Tian, T.; Xiao, H.; Long, Y.; Zhang, X.; Wang, S.; Zhou, X.; Liu, S. *Chem commun* **2012**, *48*, 10031-3.
- (6) Jiang, C.; Yan, C.-Y.; Huang, C.; Jiang, J.-H.; Yu, R.-Q. *Anal Biochem* **2012**, *423*, 224-228.
- (7) Zeng, Y.-p.; Hu, J.; Long, Y.; Zhang, C.-y. *Anal chem* **2013**, *85*, 6143-6150.
- (8) Zhao, Y.; Chen, F.; Lin, M.; Fan, C. *Biosens Bioelectron* **2014**, *54*, 565-570.
- (9) Liu, P.; Yang, X.-H.; Wang, Q.; Huang, J.; Liu, J.-B.; Zhu, Y.; He, L.-L.; Wang, K.-M. *Chinese Chem Lett* **2014**, *25*, 1047-1051.
